# Supplementary material for: Highly Sensitive Detection of Melamine Based on the Fluorescence Resonance Energy Transfer between Conjugated Polymer Nanoparticles and Gold Nanoparticles
Source: PubMed Central journal article supplement (PMC6403951; doi:10.3390/polym10080873), 2018-08-06
Supplement: polymers-10-00873-s001.pdf [file polymers-10-00873-s001.pdf]

# Supporting information

## Highly Sensitive Detection of melamine based on the fluorescence resonance energy transfer between conjugated polymer nanoparticles and gold nanoparticles

Cui-jiao Zhang <sup>a,b</sup>, Zhi-yan Gao <sup>a,b</sup>, Qiu-bo Wang <sup>a,b</sup>, Xian Zhang\* <sup>a,b</sup>, Jin-shui Yao <sup>a,b</sup>,

Qin-ze Liu <sup>a,b</sup>, Cong-de Qiao <sup>a,b</sup>

<sup>a</sup> School of Materials Science and Engineering, Qilu University of Technology (Shandong Academy of Sciences), Jinan 250353, China

<sup>b</sup> Shandong Provincial Key Laboratory of Processing and Testing Technology of Glass and Functional Ceramics; Key Laboratory of Amorphous and Polycrystalline Materials; Qilu University of Technology, Jinan 250353, China

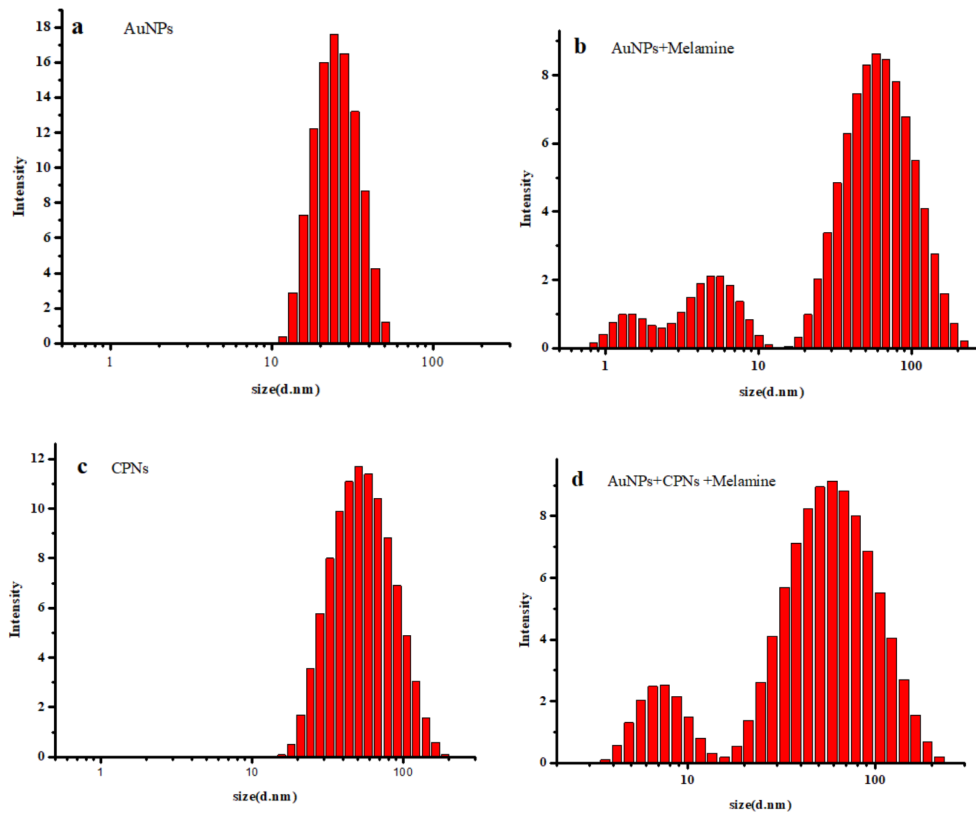

**Fig. S1.** (a) Size distribution of AuNPs (average size = 24.4 nm); (b) size distribution of AuNPs with the addition of melamine (average size = 58.8 nm); (c) size distribution of CPNs (average size = 50.7 nm); (d)

size distribution of AuNPs and CPNs with the addition of melamine (average size = 58.8 nm). Concentration of AuNPs: 2.37 nM; concentration of melamine: 100 mol L<sup>-1</sup>; concentration of CPNs: 10 µg/mL.

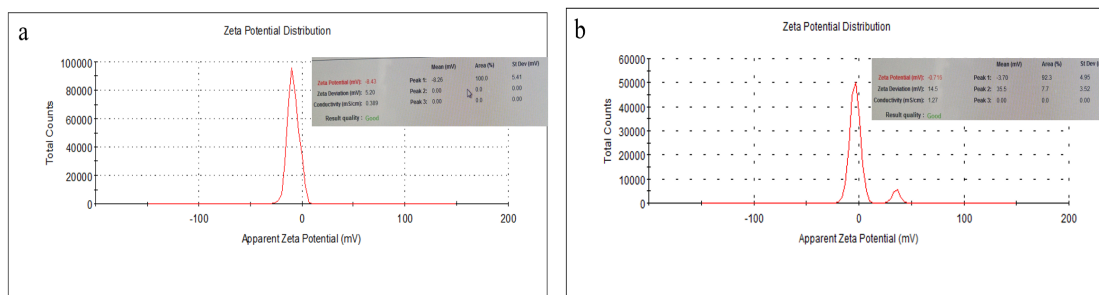

**Fig. S2.** Zeta potential of AuNPs (a) and CNPs (b) at pH = 7.0, respectively.
